# Supplementary material for: Psychological distress and burnout among healthcare worker during COVID-19 pandemic in India—A cross-sectional study
Source: PubMed Central journal article supplement (PMC8912126; doi:10.1371/journal.pone.0264956), 2022-03-10

S2. Functional diagram to explain the flow of work

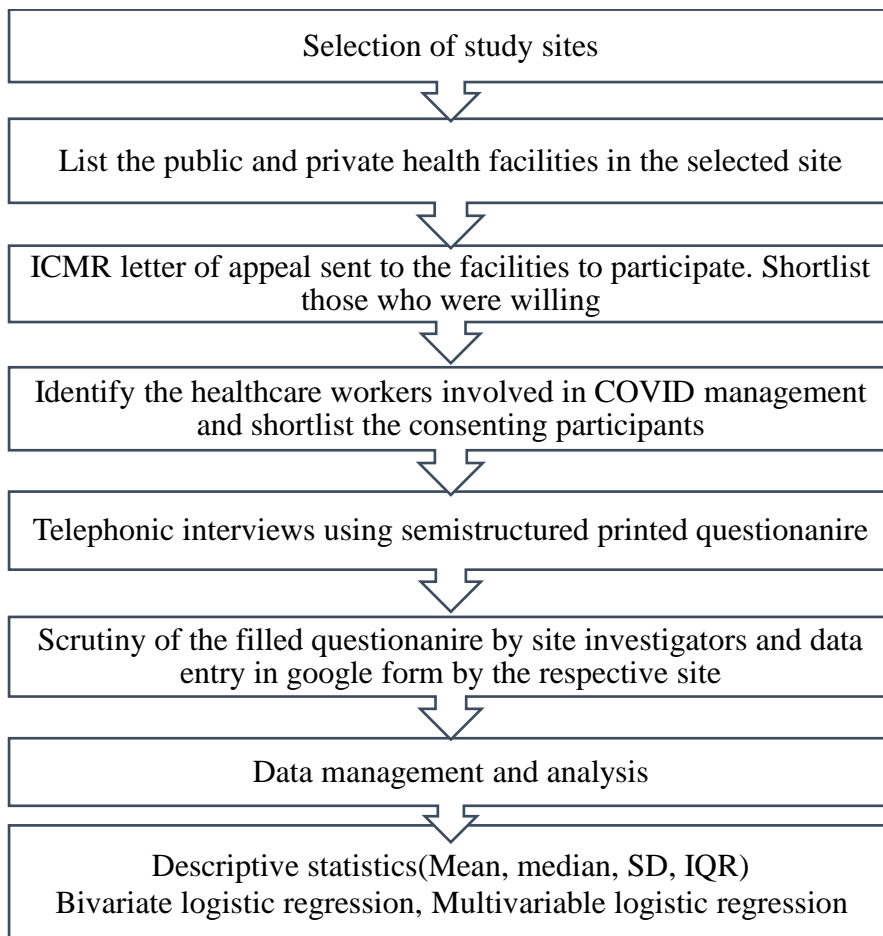

Supplement: pone.0264956.s002.pdf [file pone.0264956.s002.pdf]
